# Supplementary material
Source: PubMed Central journal article supplement (PMC8317364)
Supplement: 13049_2021_921_MOESM1_ESM.pdf [file 13049_2021_921_MOESM1_ESM.pdf]

preparation and standardization

cadaver preparation + start of recording

recruitment: 2 sustained inflation maneuvers

$P_{top}$  25 and 30 cmH<sub>2</sub>O;  $P_{start}$  5 cmH<sub>2</sub>O;  $PEEP_{end}$  5 cmH<sub>2</sub>O;  $t_{maneuver}$  30 s;  $t_{pause}$  5 s

15 min ventilation

$V_t$  6 ml/kg;  $f$  12 min<sup>-1</sup>;  $PEEP$  5 cmH<sub>2</sub>O; I:E 1:2;  $P_{max}$  40 cmH<sub>2</sub>O

baseline PV diagram (before chest compression)

lung ultrasound

pneumothorax or model instability

exclusion

inclusion + randomization

2 min ventilation

$V_t$  6 ml/kg;  $f$  10 min<sup>-1</sup>;  $PEEP$  5 cmH<sub>2</sub>O; I:E 1:5;  $P_{max}$  60 cmH<sub>2</sub>O

2 min chest compression only

chest compressions: 103 min<sup>-1</sup>; depth 5cm;  $PEEP$  1 cmH<sub>2</sub>O

lung ultrasound

2 min chest compression + ventilation

$V_t$  6 ml/kg;  $f$  10 min<sup>-1</sup>;  $PEEP$  0 cmH<sub>2</sub>O; I:E 1:5;  $P_{max}$  60 cmH<sub>2</sub>O

lung ultrasound

mechanical properties testing

intervention phase

first PV diagram

2 min CPR segment

lung ultrasound

2 min CPR segment

lung ultrasound

**ventilator settings:**  
IPPV;  $V_t$  6 ml/kg;  $f$  10 min<sup>-1</sup>;  $PEEP$  0 cmH<sub>2</sub>O; I:E 1.5/1.4;  $P_{max}$  60cmH<sub>2</sub>O  
**chest compressions:**  
103 min<sup>-1</sup>; depth 5 cm

second crossover period \* (2<sup>nd</sup> transport ventilator)

third crossover period \* (3<sup>rd</sup> transport ventilator)

final PV diagram

\* [detailed workflow as shown in "first cross over period"]
