# Supplementary material
Source: PubMed Central journal article supplement (PMC8317364)
Supplement: 13049_2021_921_MOESM2_ESM.pdf [file 13049_2021_921_MOESM2_ESM.pdf]

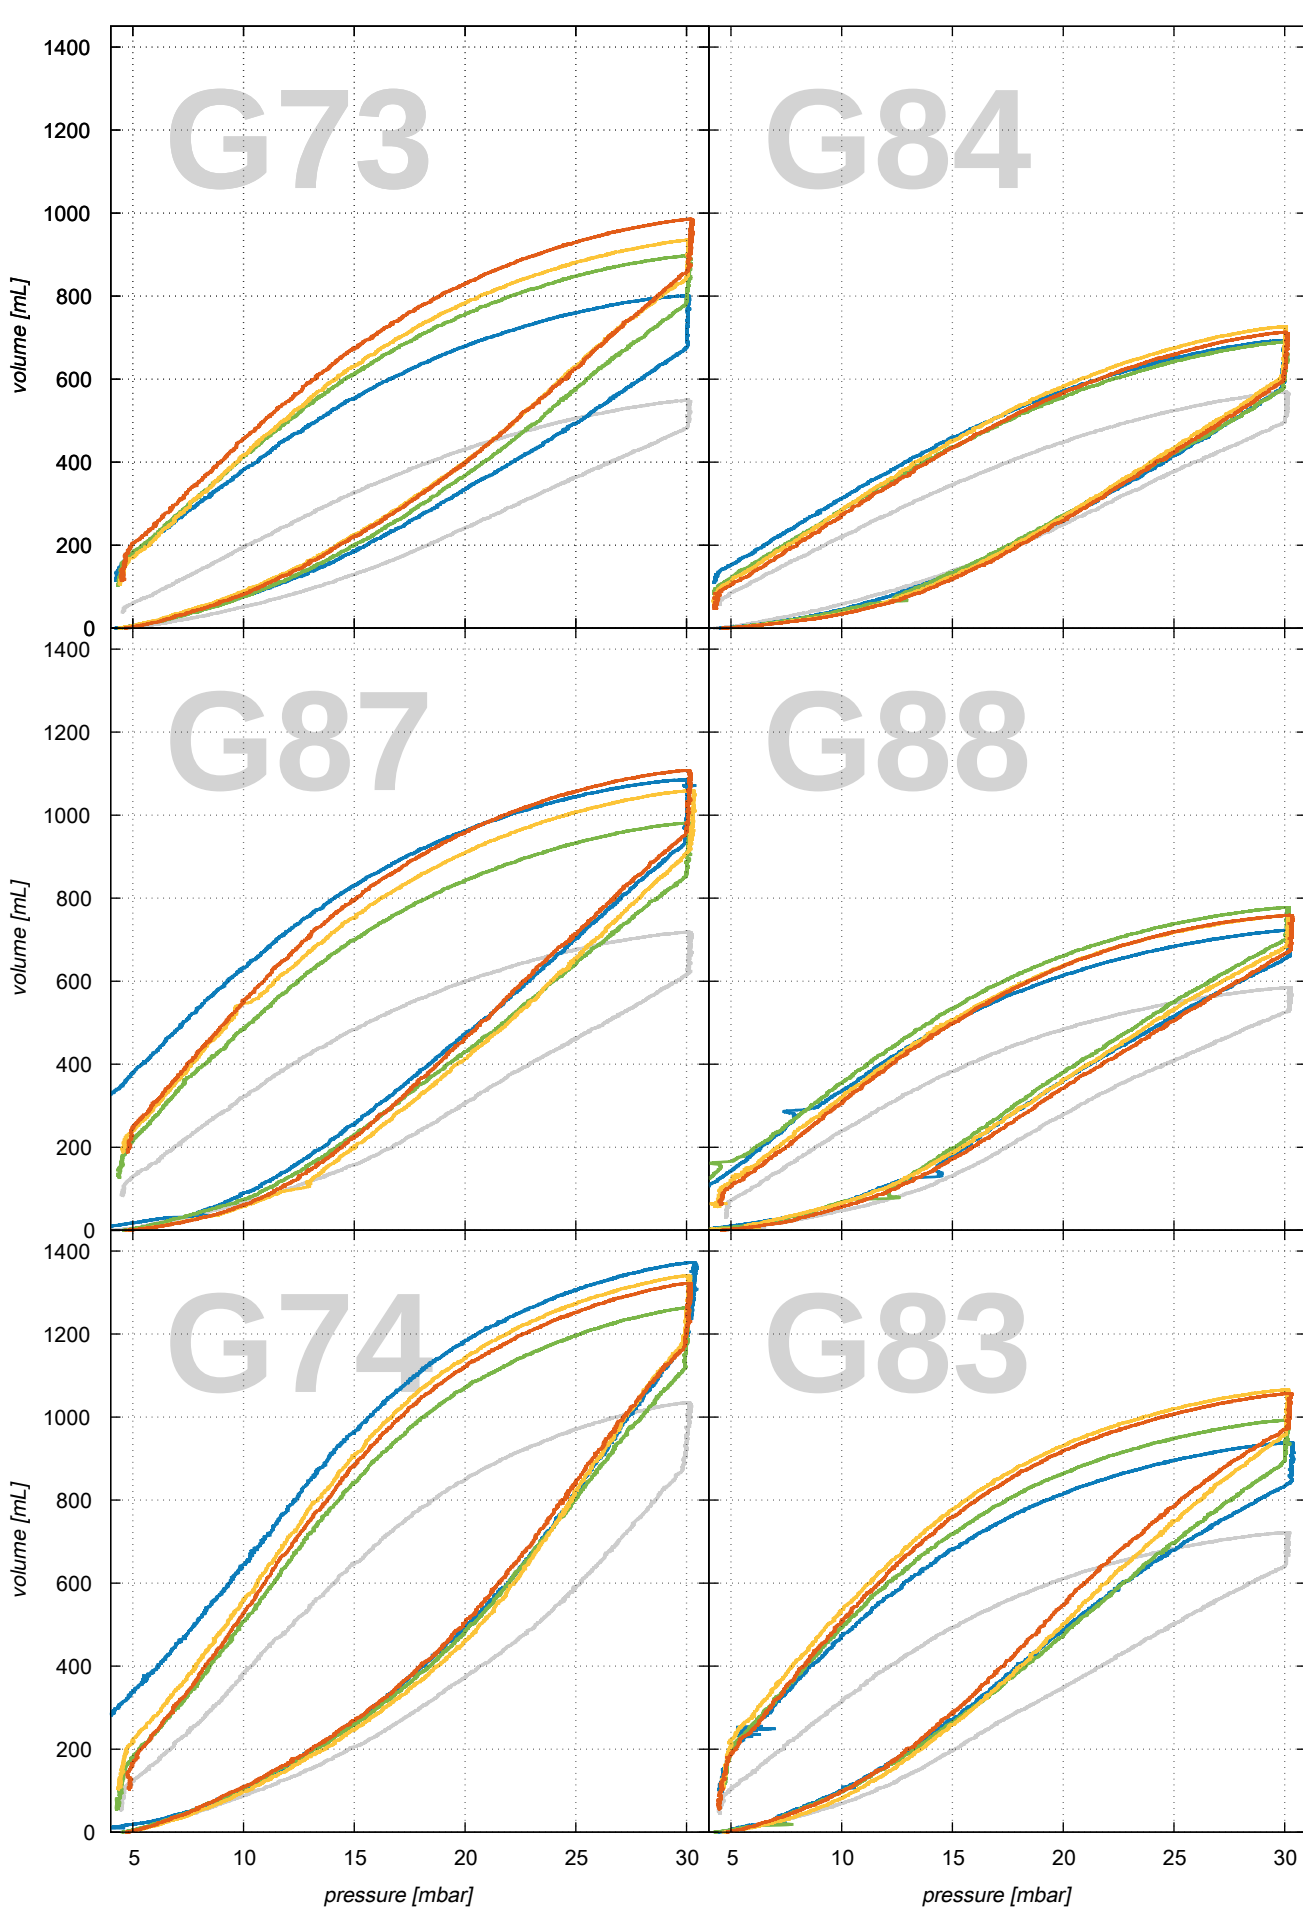

— before chest compressions  
 — 1st — 2nd — 3rd — final
