# Supplementary material
Source: PubMed Central journal article supplement (PMC8317364)
Supplement: 13049_2021_921_MOESM3_ESM.pdf [file 13049_2021_921_MOESM3_ESM.pdf]

**Supplemental Digital Content 4** tables with contrasts and coefficients of the three presented mixed linear models

1<sup>st</sup> linear mixed model for influence of ventilator model on  $V_{t_{\text{insp-missed}}}$

| <b>ventilator model</b> | <b>estimate</b> | <b>lower CI</b> | <b>Upper CI</b> | <b>t-value</b> | <b>p-value</b> |
|-------------------------|-----------------|-----------------|-----------------|----------------|----------------|
| MonnalT60               | -14,487         | -22,495         | -6,480          | -3,550         | 0.0004         |
| Oxylog3000              | -30,557         | -38,556         | -22,558         | -7,500         | <.0001         |
| MedumatStandard         | -30,956         | -38,942         | -22,970         | -7,610         | <.0001         |

*Supplement Table 1 estimated population means for the ventilator model, statistical model on missed inspiratory tidal volume*

| effect                          | level           | estimate | degrees of freedom | std. error | t-value | p-value |        |
|---------------------------------|-----------------|----------|--------------------|------------|---------|---------|--------|
| intercept                       |                 | 234,360  | 4                  | 122,020    | 1,920   | 0.1272  |        |
| ventilator model                | MonnalT60       | 16,469   | 677                | 0,978      | 16,840  | <.0001  |        |
| ventilator model                | Oxylog3000      | 0,399    | 677                | 0,972      | 0,410   | 0.6817  |        |
| ventilator model                | MedumatStandard | 0,000    |                    |            |         |         |        |
| segment of CPR                  |                 | 2        | 0,074              | 677        | 1,382   | 0,050   | 0.9576 |
| segment of CPR                  |                 | 3        | -7,124             | 677        | 1,384   | -5,150  | <.0001 |
| segment of CPR                  |                 | 4        | -3,901             | 677        | 1,381   | -2,830  | 0.0049 |
| segment of CPR                  |                 | 5        | -2,255             | 677        | 1,383   | -1,630  | 0.1035 |
| segment of CPR                  |                 | 6        | -8,886             | 677        | 1,383   | -6,420  | <.0001 |
| segment of CPR                  |                 | 1        | 0,000              |            |         |         |        |
| breath within cross-over period |                 | 2        | -4,010             | 677        | 2,876   | -1,390  | 0.1638 |
| breath within cross-over period |                 | 3        | -4,857             | 677        | 2,876   | -1,690  | 0.0918 |
| breath within cross-over period |                 | 4        | -2,570             | 677        | 2,876   | -0,890  | 0.3719 |
| breath within cross-over period |                 | 5        | -3,771             | 677        | 2,876   | -1,310  | 0.1903 |
| breath within cross-over period |                 | 6        | -5,128             | 677        | 2,876   | -1,780  | 0.0751 |
| breath within cross-over period |                 | 7        | -2,124             | 677        | 2,876   | -0,740  | 0.4606 |
| breath within cross-over period |                 | 8        | -3,221             | 677        | 2,876   | -1,120  | 0.2632 |
| breath within cross-over period |                 | 9        | -4,836             | 677        | 2,876   | -1,680  | 0.0932 |
| breath within cross-over period |                 | 10       | -0,017             | 677        | 2,988   | -0,010  | 0.9955 |
| breath within cross-over period |                 | 11       | -4,894             | 677        | 2,892   | -1,690  | 0.0910 |
| breath within cross-over period |                 | 12       | -8,032             | 677        | 2,876   | -2,790  | 0.0054 |
| breath within cross-over period |                 | 13       | -6,054             | 677        | 2,892   | -2,090  | 0.0367 |
| breath within cross-over period |                 | 14       | -3,530             | 677        | 2,876   | -1,230  | 0.2202 |
| breath within cross-over period |                 | 15       | -6,078             | 677        | 2,876   | -2,110  | 0.0350 |
| breath within cross-over period |                 | 16       | -6,867             | 677        | 2,876   | -2,390  | 0.0172 |
| breath within cross-over period |                 | 17       | -2,673             | 677        | 2,876   | -0,930  | 0.3531 |
| breath within cross-over period |                 | 18       | -4,152             | 677        | 2,876   | -1,440  | 0.1493 |
| breath within cross-over period |                 | 19       | -6,520             | 677        | 2,876   | -2,270  | 0.0237 |
| breath within cross-over period |                 | 20       | -3,629             | 677        | 3,086   | -1,180  | 0.2399 |
| breath within cross-over period |                 | 21       | -8,597             | 677        | 3,297   | -2,610  | 0.0093 |
| breath within cross-over period |                 | 22       | -9,273             | 677        | 6,603   | -1,400  | 0.1606 |
| breath within cross-over period |                 | 23       | -12,125            | 677        | 7,887   | -1,540  | 0.1247 |
| breath within cross-over period |                 | 24       | -21,329            | 677        | 10,927  | -1,950  | 0.0514 |
| breath within cross-over period |                 | 25       | -14,729            | 677        | 10,927  | -1,350  | 0.1782 |
| breath within cross-over period |                 | 1        | 0,000              |            |         |         |        |
| height                          |                 | -1,520   | 677                | 0,724      | -2,100  | 0.0362  |        |
| sex                             | female          | -6,416   | 677                | 8,542      | -0,750  | 0.4528  |        |
| sex                             | male            | 0,000    |                    |            |         |         |        |

Supplement Table 2 fixed effects coefficients, statistical model on missed inspiratory tidal volume

2<sup>nd</sup> linear mixed model for influence of ventilator model on peak flow

| <b>contrast</b>          | <b>estimate</b> | <b>std. error</b> | <b>p-value</b> | <b>lower CI</b> | <b>upper CI</b> |
|--------------------------|-----------------|-------------------|----------------|-----------------|-----------------|
| Monnal T60               | 22,587          | 0,621             | 0,00000        | 21,132          | 24,043          |
| Oxylog 3000              | 1,128           | 0,617             | 0,16042        | -0,318          | 2,574           |
| Monnal T60 – Oxylog 3000 | 21,459          | 0,617             | 0,00000        | 20,014          | 22,904          |

*Supplement Table 3 contrasts with simultaneous confidence intervals, statistical model on peak flow*

| <b>variable</b>                 | <b>level</b> | <b>coefficient</b> |
|---------------------------------|--------------|--------------------|
| (intercept)                     |              | 227,948            |
| ventilator model                | Monnal T60   | 16,468             |
| ventilator model                | Oxylog 3000  | 0,399              |
| sex                             | male         | 6,416              |
| height                          |              | -1,520             |
| segment of CPR                  | 2            | 0,074              |
| segment of CPR                  | 3            | -7,124             |
| segment of CPR                  | 4            | -3,901             |
| segment of CPR                  | 5            | -2,255             |
| segment of CPR                  | 6            | -8,886             |
| breath within cross-over period | 2            | -4,010             |
| breath within cross-over period | 3            | -4,857             |
| breath within cross-over period | 4            | -2,570             |
| breath within cross-over period | 5            | -3,771             |
| breath within cross-over period | 6            | -5,128             |
| breath within cross-over period | 7            | -2,124             |
| breath within cross-over period | 8            | -3,221             |
| breath within cross-over period | 9            | -4,836             |
| breath within cross-over period | 10           | -0,017             |
| breath within cross-over period | 11           | -4,894             |
| breath within cross-over period | 12           | -8,032             |
| breath within cross-over period | 13           | -6,054             |
| breath within cross-over period | 14           | -3,530             |
| breath within cross-over period | 15           | -6,078             |
| breath within cross-over period | 16           | -6,867             |
| breath within cross-over period | 17           | -2,673             |
| breath within cross-over period | 18           | -4,152             |
| breath within cross-over period | 19           | -6,520             |
| breath within cross-over period | 20           | -3,629             |
| breath within cross-over period | 21           | -8,597             |
| breath within cross-over period | 22           | -9,273             |
| breath within cross-over period | 23           | -12,125            |
| breath within cross-over period | 24           | -21,329            |
| breath within cross-over period | 25           | -14,729            |

*Supplement Table 4 fixed effects coefficients, statistical model on peak flow*

### 3<sup>rd</sup> linear mixed model for influence of ventilator model on peak airway pressure

| <b>contrast</b>          | <b>estimate</b> | <b>std. error</b> | <b>p-value</b> | <b>lower CI</b> | <b>upper CI</b> |
|--------------------------|-----------------|-------------------|----------------|-----------------|-----------------|
| Monnal T60               | -9,166          | 0,338             | 0,00000        | -9,957          | -8,374          |
| Oxylog 3000              | 1,445           | 0,336             | 0,00006        | 0,658           | 2,231           |
| Monnal T60 – Oxylog 3000 | -10,610         | 0,335             | 0,00000        | -11,396         | -9,824          |

*Supplement Table 5 contrasts with simultaneous confidence intervals, statistical model on peak airway pressure*

| <b>variable</b>                 | <b>level</b> | <b>coefficient</b> |
|---------------------------------|--------------|--------------------|
| (intercept)                     |              | 227,948            |
| ventilator Model                | Monnal T60   | 16,468             |
| ventilator Model                | Oxylog 3000  | 0,399              |
| sex                             | male         | 6,416              |
| height                          |              | -1,520             |
| segment of CPR                  | 2            | 0,074              |
| segment of CPR                  | 3            | -7,124             |
| segment of CPR                  | 4            | -3,901             |
| segment of CPR                  | 5            | -2,255             |
| segment of CPR                  | 6            | -8,886             |
| breath within cross-over period | 2            | -4,010             |
| breath within cross-over period | 3            | -4,857             |
| breath within cross-over period | 4            | -2,570             |
| breath within cross-over period | 5            | -3,771             |
| breath within cross-over period | 6            | -5,128             |
| breath within cross-over period | 7            | -2,124             |
| breath within cross-over period | 8            | -3,221             |
| breath within cross-over period | 9            | -4,836             |
| breath within cross-over period | 10           | -0,017             |
| breath within cross-over period | 11           | -4,894             |
| breath within cross-over period | 12           | -8,032             |
| breath within cross-over period | 13           | -6,054             |
| breath within cross-over period | 14           | -3,530             |
| breath within cross-over period | 15           | -6,078             |
| breath within cross-over period | 16           | -6,867             |
| breath within cross-over period | 17           | -2,673             |
| breath within cross-over period | 18           | -4,152             |
| breath within cross-over period | 19           | -6,520             |
| breath within cross-over period | 20           | -3,629             |
| breath within cross-over period | 21           | -8,597             |
| breath within cross-over period | 22           | -9,273             |
| breath within cross-over period | 23           | -12,125            |
| breath within cross-over period | 24           | -21,329            |
| breath within cross-over period | 25           | -14,729            |

*Supplement Table 6 fixed effects coefficients, statistical model on peak airway pressure*
